# Supplementary material for: A Raman, SERS and UV-circular dichroism spectroscopic study of N-acetyl-l-cysteine in aqueous solutions
Source: Royal Society of Chemistry journal article supplement (doi:10.1039/c9nj02427a), 2019-01-01

## RAMAN, SERS AND UV AND CIRCULAR DICHROISM OF N-ACETYL-L-CYSTEINE IN AQUEOUS SOLUTIONS.

R. A. Cobos Picot<sup>1</sup>, M. Puiatti<sup>2</sup>, A. Ben Altabef<sup>1</sup>, Rubira R.J.G<sup>3</sup>, S. Sanchez-Cortes<sup>4</sup>, S. B. Diaz<sup>1</sup>, M. E. Tuttolomondo<sup>1\*</sup>

<sup>1</sup>INQUINOA-CONICET, Instituto de Química Física, Facultad de Bioquímica, Química y Farmacia, Universidad Nacional de Tucumán, San Lorenzo 456, T4000CAN, Tucumán, R. Argentina.\*E-mail: [metuttolomondo@fbqf.unt.edu.ar](mailto:metuttolomondo@fbqf.unt.edu.ar)

<sup>2</sup>INFIQC - CONICET, Instituto de Investigaciones en Físico-Química Orgánica de Córdoba, - Facultad de Químicas, Universidad Nacional de Córdoba, Córdoba, R. Argentina.

<sup>3</sup>São Paulo State University (UNESP), School of Technology and Applied Sciences, 19060-900, Presidente Prudente, SP, Brazil.

<sup>4</sup>Instituto de Estructura de la Materia, IEM-CSIC, Serrano 121, 28006 Madrid, Spain

**Table S1-** Free energies (energies in Hartrees), differences in free energies for conformers of N-acetyl cysteine.

| Conformers   | G           | S             | $\Delta G^b$ | % population <sup>c</sup> |
|--------------|-------------|---------------|--------------|---------------------------|
|              |             | <i>kJ/mol</i> |              |                           |
| <i>1-NAC</i> | -874.688003 | 0.4923        | 0.00         | 29.08                     |
| <i>2-NAC</i> | -874.687759 | 0.4695        | 0.64         | 22.45                     |
| <i>3-NAC</i> | -874.687581 | 0.4466        | 1.11         | 18.59                     |
| <i>4-NAC</i> | -874.687478 | 0.4724        | 1.38         | 16.67                     |

<sup>a</sup>B3LYP/6-311++G(d,p),IEFPCM(water);<sup>b</sup> $\Delta G = G_{NAC-i} - G_{NAC-1}$ ; <sup>c</sup>The population was calculated according

to a Boltzmann distribution:  $\%pop_i = \frac{e^{-\Delta G_i/RT}}{\sum_{k=1}^n e^{-\Delta G_k/RT}} \times 100\%$

**Table S2.** Experimental and calculated bond distances and angles for *NAC*.

|                                        | <i>1-NAC</i>                      |        | <i>2-NAC</i>                |        | <i>3-NAC</i>                      |        | <i>4-NAC</i>                  |        |
|----------------------------------------|-----------------------------------|--------|-----------------------------|--------|-----------------------------------|--------|-------------------------------|--------|
|                                        | <i>(-)gauche, anti, (-)gauche</i> |        | <i>(+)gauche, anti, syn</i> |        | <i>(+)gauche, anti, (+)gauche</i> |        | <i>anti., anti, (+)gauche</i> |        |
| Distances/Å                            | Neutron <sup>a</sup>              |        | Calculated <sup>b</sup>     |        |                                   |        |                               |        |
| N-H                                    |                                   | 1.0097 |                             | 1.0089 |                                   | 1.010  |                               | 1.010  |
| N-C <sub>α</sub>                       | 1.452                             | 1.446  |                             | 1.447  |                                   | 1.466  |                               | 1.457  |
| C <sub>α</sub> -C <sub>β</sub>         | 1.532                             | 1.536  |                             | 1.538  |                                   | 1.527  |                               | 1.536  |
| C <sub>β</sub> -S                      | 1.808                             | 1.849  |                             | 1.842  |                                   | 1.838  |                               | 1.838  |
| S-H                                    | 1.338                             | 1.348  |                             | 1.348  |                                   | 1.348  |                               | 1.349  |
| C <sub>α</sub> -C(3)                   | 1.522                             | 1.536  |                             | 1.530  |                                   | 1.548  |                               | 1.531  |
| C=O(1)                                 | 1.247                             | 1.230  |                             | 1.231  |                                   | 1.243  |                               | 1.229  |
| C=O(2)                                 | 1.213                             | 1.206  |                             | 1.209  |                                   | 1.209  |                               | 1.209  |
| C-O(3)                                 | 1.315                             | 1.344  |                             | 1.340  |                                   | 1.334  |                               | 1.340  |
| O(3)-H                                 |                                   | 0.971  |                             | 0.971  |                                   | 0.996  |                               | 0.972  |
| C(1)-C(2)                              | 1.498                             | 1.512  |                             | 1.512  |                                   | 1.505  |                               | 1.513  |
| N-C(2)                                 | 1.337                             | 1.363  |                             | 1.362  |                                   | 1.351  |                               | 1.364  |
| H(N)...S                               | 2.747                             | 3.335  |                             | 3.131  |                                   | 3.292  |                               | 4.538  |
| N-H...O(3) <sup>c</sup>                | 2.365                             |        |                             | 2.630  |                                   |        |                               |        |
| N-H...O(2) <sup>c</sup>                |                                   | 2.988  |                             | 3.910  |                                   | 3.86   |                               | 2.831  |
| Angles/°                               |                                   |        |                             |        |                                   |        |                               |        |
| N-C <sub>α</sub> -C <sub>β</sub>       | 112.6                             | 111.9  |                             | 113.4  |                                   | 111.0  |                               | 110.8  |
| N-C <sub>α</sub> -C(3)                 | 112.3                             | 111.3  |                             | 113.6  |                                   | 111.3  |                               | 108.1  |
| C <sub>β</sub> -S-H                    | 96.9                              | 95.9   |                             | 97.4   |                                   | 98.0   |                               | 97.0   |
| O(17)-C(3)-O(3)                        | 124.8                             | 123.8  |                             | 123.5  |                                   | 121.5  |                               | 123.8  |
| C <sub>α</sub> -C(3)-O(3)              | 115.1                             | 110.9  |                             | 113.6  |                                   | 114.7  |                               | 112.4  |
| C(2)-N-C <sub>α</sub>                  | 120.8                             | 122.6  |                             | 122.8  |                                   | 123.2  |                               | 123.3  |
| O(1)-C(2)-N                            | 120.6                             | 122.2  |                             | 122.3  |                                   | 120.9  |                               | 122.5  |
| Dihedralangles/°                       |                                   |        |                             |        |                                   |        |                               |        |
| S-C <sub>β</sub> -C <sub>α</sub> -N    | 61.8                              | -59.0  |                             | 62.6   |                                   | 59.9   |                               | -179.6 |
| C <sub>β</sub> -C <sub>α</sub> -N-C(2) | 178.6                             | 176.8  |                             | 178.8  |                                   | 178.5  |                               | -179.2 |
| C <sub>α</sub> -N-C(2)-C(1)            | 163.8                             | -91.7  |                             | -123.3 |                                   | -149.9 |                               | -124.6 |
| N-C <sub>α</sub> -C(3)-O(3)            | 1.1                               | 172.1  |                             | 9.7    |                                   | 60.2   |                               | 111.9  |

<sup>a</sup> ref [14]; <sup>b</sup>B3LYP/6-311++G(d,p), IEFPCM(water); <sup>c</sup>ref [36]

**Table S3-** Selected bands observed in the Raman spectra of N-acetyl-Lcysteine in aqueous solution at 1.7-6.14 pH and SERS spectra.

|            | Normal Raman        |              |           |            |                       |                       | SERS                        |                                                   |
|------------|---------------------|--------------|-----------|------------|-----------------------|-----------------------|-----------------------------|---------------------------------------------------|
| Solid      | Water solution (1M) |              |           |            |                       |                       | Water solution (25 $\mu$ M) |                                                   |
|            | pH                  |              |           |            |                       |                       |                             | Approximate description of modes                  |
|            | 1.76                | 2.5          | 3.01      | 4.01       | 5.10                  | 6.14                  |                             |                                                   |
| 2548 (100) | 2582 (69)           | 2582 (77)    | 2581 (78) |            | 2580(77)              | 2581(79)              |                             | $\nu$ S-H                                         |
| 1718 (20)  | 1722 (13)           | 1721 (10)    | 1721 sh   | -          | -                     | -                     |                             | $\nu$ C=O(OH)                                     |
| 1590 (15)  | 1645 (23)           | 1645(23)     | 1642(24)  | 1642(23)br | 1643 (23)<br>1632(26) | 1642 (51)<br>1632(26) | 1649                        | $\nu$ C=O(NH)                                     |
| -          | -                   | -            | 1558 sh   | 1559 sh    | 1556 sh               | 1559 sh               | 1555                        | $\nu_a$ COO <sup>-</sup>                          |
| 1521 sh    |                     |              |           |            |                       |                       |                             | $\delta$ NH                                       |
| 1520 sh    | 1447 sh             | 1440 sh      | 1440 sh   | 1440 sh    | 1438 sh               | 1440 sh               |                             | $\delta_a$ CH <sub>3</sub>                        |
| 1430 (2)   | 1429 (10)           | 1429 (10)    | 1427 (11) | 1427 (15)  | 1428 (20)             | 1426 (19)             | 1415                        | $\delta$ CH <sub>2</sub>                          |
| 1414 (8)   | 1419 sh             |              |           |            |                       |                       |                             | $\delta_a$ CH <sub>3</sub>                        |
| -          | -                   | 1396 sh      | 1395 sh   | 1394 (25)  | 1395 (25)             | 1395 (27)             | 1377                        | $\nu_s$ COO <sup>-</sup>                          |
| 1373 (9)   | 1379 (11)           | 1381 (11)    | 1381 (13) | 1381(21)   | 1380 (21)             | 1383 sh               |                             | $\delta_s$ CH <sub>3</sub>                        |
| 1334 (4)   | 1326 sh             | 1327 sh      | 1328 (15) | 1329 (23)  | 1330(22)              | 1330 (24)             | 1316                        | $\delta$ C <sub><math>\alpha</math></sub> H       |
| 1313 (1)   | 1314 (12)           | 1312 (13) br | 1301 (13) | 1297 (18)  | 1296 (16)             | 1297 (17)             | 1282                        | $\nu$ N-C(O)                                      |
| 1277 (4)   | 1280 sh             | 1280 sh      | 1280 sh   | 1280 sh    | 1280 sh               | 1282 sh               |                             | tw CH <sub>2</sub>                                |
| 1260 sh    | 1261 (3)            | 1248 (2)     | 1248 (2)  | 1248 (2)   | 1250 (1)              | 1250 sh               | 1234                        | wag CH <sub>2</sub>                               |
| 1200 (6)   | 1200 (1)            | 1200 (2)     | 1200(2)   | 1200(2)    | 1200(2)               | 1201 (6)              | 1179                        | $\delta$ C <sub><math>\alpha</math></sub> H       |
| 1128 (5)   | 1133 (5)            | 1134 (4)     | 1134(4)   | 1129 (4)   | 1128 (5)              | 1129 (6)              |                             | $\nu$ N-C $\alpha$                                |
|            | 1061 sh             | 1064 sh      | 1064 sh   | 1064 sh    |                       | 1070 (4)              |                             | $\rho$ CH <sub>3</sub>                            |
| 1043 (11)  | 1044 (5)            | 1042 (2)     | 1041(2)   | 1039 (4)   | 1040 (4)              | 1041 (7)              | 1044                        | $\nu$ C <sub><math>\beta</math></sub> -C $\alpha$ |
|            | 1025(2)             | 1025(2)      | 1025(2)   | 1025(2)    | 1025(2)               | 1025(2)               |                             | $\nu$ C(O)-CH <sub>3</sub>                        |

|             |             |          |           |          |          |          |            |                                     |
|-------------|-------------|----------|-----------|----------|----------|----------|------------|-------------------------------------|
| 989<br>(11) | 986<br>(16) | 983 (13) | 983 (15)  | 983(25)  | 982 (22) | 984 (23) | 996        | νCα-CO <sub>2</sub> <sup>-</sup>    |
|             | 967<br>(12) | 966 (10) | 967 (10)  | 968(18)  | 969 sh   | 967 sh   | 948        |                                     |
| 901<br>(6)  | 895 (3)     | 897 (4)  | 897 (4)   | 894(2)   | 895(2)   | 897 (2)  | 881        | νCα-C(O)                            |
|             |             |          |           | 820 (8)  | 825 (9)  | 821 (9)  | 838        | δ CO <sub>2</sub> <sup>-</sup>      |
| 795<br>(13) | 793 (9)     | 772 (2)  | 772 (2)   | 779(4)   | 780 (7)  | 780 (7)  | 795        | δ C-S-H                             |
| 695<br>(25) | 685<br>(26) | 680 (21) | 679 (45)  | 685(40)  | 686 (31) | 684 (34) |            | ν C-S                               |
| 676<br>(9)  | 658<br>(14) | 654 (2)  | 653 (1.2) | 656(13)  | 653 sh   | 653 sh   |            | πCH <sub>3</sub> -C=O out-of- plane |
| 649<br>(5)  | 649 sh      | 647 (2)  |           |          |          |          | 735<br>650 | π C=O <sub>acid</sub> in-of- plane  |
| 575<br>(7)  | 584 sh      | 600 (2)  | 535 (0.5) |          |          |          | 539        | π C=O <sub>acid</sub> of- plane     |
| 373<br>(15) | 389 (6)     | 385(5)   | 388 (0.5) | 387 (12) | 386 (1)  | 386 (10) |            | ρ N-H out-of- plane                 |

**Table S4-** Free energies (energies in Hartrees), differences in free energies for three conformers of *NACdep*<sup>-</sup>

| Conformers                   | G <sup>a</sup> | S      | ΔG <sup>b</sup> | % population <sup>c</sup> |
|------------------------------|----------------|--------|-----------------|---------------------------|
| <i>kJ/mol</i>                |                |        |                 |                           |
| <i>1-NACdep</i> <sup>-</sup> | -874.244533    | 0.4548 | 0.00            | 75.51                     |
| <i>2-NACdep</i> <sup>-</sup> | -874.242897    | 0.4530 | 1.03            | 13.34                     |
| <i>3-NACdep</i> <sup>-</sup> | -874.242703    | 0.4541 | 1.15            | 10.86                     |
| <i>4-NACdep</i> <sup>-</sup> | -874.238252    | 0.4601 | 3.94            | 0.10                      |
| <i>5-NACdep</i> <sup>-</sup> | -874.238899    | 0.4590 | 3.54            | 0.19                      |

<sup>a</sup>B3LYP/6-311++G(d,p),IEFPCM(water);<sup>b</sup>ΔG = G<sub>NACdep-i</sub> - G<sub>NACdep-1</sub>; <sup>c</sup>The population was calculated according to a

Boltzmann distribution: 
$$\%pop_i = \frac{e^{-\Delta G_i/RT}}{\sum_{k=1}^n e^{-\Delta G_k/RT}} \times 100\%$$

**Table S5.** Calculated bond distances and angles for *NACdep*<sup>-</sup>

| Distances/ | <i>1-NACdep</i> <sup>-</sup> | <i>2-NACdep</i> <sup>-</sup> | <i>3-NACdep</i> <sup>-</sup> |
|------------|------------------------------|------------------------------|------------------------------|
|------------|------------------------------|------------------------------|------------------------------|

| Å                                                                               |       |       |        |
|---------------------------------------------------------------------------------|-------|-------|--------|
| (+) <i>gauche, anti, syn</i> (-) <i>gauche, anti, (-)gauche</i> Anti, anti, syn |       |       |        |
| N-C <sub>α</sub>                                                                | 1.456 | 1.456 | 1.457  |
| C <sub>α</sub> -C <sub>β</sub>                                                  | 1.536 | 1.535 | 1.541  |
| C <sub>β</sub> -S                                                               | 1.842 | 1.854 | 1.853  |
| S-H                                                                             | 1.348 | 1.349 | 1.350  |
| C <sub>α</sub> -C(3)                                                            | 1.568 | 1.569 | 1.560  |
| C=O(1)                                                                          | 1.234 | 1.236 | 1.238  |
| C=O(2)                                                                          | 1.256 | 1.253 | 1.258  |
| C=O(3)                                                                          | 1.254 | 1.256 | 1.253  |
| C(1)-C(2)                                                                       | 1.517 | 1.516 | 1.516  |
| N-C2                                                                            | 1.356 | 1.353 | 1.349  |
| H(S)...N                                                                        | 2.831 | -     | -      |
| N-<br>H...O(2)                                                                  | 2.25  | 2.16  | 2.10   |
| Angles/°                                                                        |       |       |        |
| N-C <sub>α</sub> -C <sub>β</sub>                                                | 112.1 | 112.8 | 109.6  |
| N-C <sub>α</sub> -C(3)                                                          | 110.1 | 109.5 | 108.8  |
| C <sub>β</sub> -S-H                                                             | 97.0  | 96.0  | 95.6   |
| O(2)-C(3)-<br>O(3)                                                              | 127.9 | 127.9 | 127.7  |
| C <sub>α</sub> -C(3)-<br>O(3)                                                   | 116.7 | 115.5 | 116.9  |
| C(2)-N-C <sub>α</sub>                                                           | 124.6 | 124.6 | 124.6  |
| O(1)-C(2)-<br>N                                                                 | 124.4 | 123.1 | 122.7  |
| Dihedralan<br>gles/°                                                            |       |       |        |
| S-C <sub>β</sub> -C <sub>α</sub> -N                                             | 65.0  | -65.5 | -170.0 |
| C <sub>α</sub> -N-C(5)-<br>C(1)                                                 | 169.7 | 171.0 | 175.5  |
| C <sub>β</sub> -C <sub>α</sub> -N-<br>C(2)                                      | 115.6 | 104.5 | 80.1   |
| N-C <sub>α</sub> -C(3)-<br>O(3)                                                 | 162.9 | 135.3 |        |

<sup>a</sup> ref [5]; <sup>ba</sup>B3LYP/6-311++G(d,p), IEFPCM(water);

**Table S6-** Free energies (energies in Hartrees), differences in free energies for conformers of *NACdepp*<sup>-2</sup>

| Conformers                     | G             | S      | $\Delta G^b$ | % population <sup>c</sup> |
|--------------------------------|---------------|--------|--------------|---------------------------|
|                                | <i>kJ/mol</i> |        |              |                           |
| <i>1-NACdepp</i> <sup>-2</sup> | -873.777673   | 0.4370 | 0            | 42.0                      |
| <i>2-NACdepp</i> <sup>-2</sup> | -873.777589   | 0.4387 | 0.66         | 38.0                      |
| <i>3-NACdepp</i> <sup>-2</sup> | -873.777195   | 0.4461 | 0.30         | 13.3                      |
| <i>4-NACdepp</i> <sup>-2</sup> | -874.238252   | 0.4447 | 2.62         | 0.30                      |

<sup>a</sup>B3LYP/6-311++G(d,p),IEFPCM(water),<sup>b</sup> $\Delta G = G_{NACdepp-i} - G_{NACdepp-1}$ ;<sup>c</sup>The population was calculated according to a

Boltzmann distribution:  $\%pop_i = \frac{e^{-\Delta G_i/RT}}{\sum_{k=1}^n e^{-\Delta G_k/RT}} \times 100\%$

**Table S7.** Calculated bond distances and angles for *NACdepp*<sup>-2</sup>

| Distances/Å                       | <i>1-NACdepp</i> <sup>-2</sup> | <i>2-NACdepp</i> <sup>-2</sup> | <i>3-NACdepp</i> <sup>-2</sup> |
|-----------------------------------|--------------------------------|--------------------------------|--------------------------------|
|                                   | (+)gauche, anti, syn           | (+)gauche, syn, anti           | (-)gauche, anti, syn           |
| N-C <sub>α</sub>                  | 1.452                          | 1.458                          | 1.459                          |
| C <sub>α</sub> -C <sub>β</sub>    | 1.543                          | 1.545                          | 1.545                          |
| C <sub>β</sub> -S                 | 1.858                          | 1.856                          | 1.854                          |
| C <sub>α</sub> -C(3)              | 1.565                          | 1.557                          | 1.561                          |
| C=O(1)                            | 1.240                          | 1.240                          | 1.239                          |
| C=O(2)                            | 1.261                          | 1.260                          | 1.260                          |
| C=O(3)                            | 1.255                          | 1.256                          | 1.258                          |
| C(1)-C(2)                         | 1.518                          | 1.518                          | 1.516                          |
| N-C(2)                            | 1.344                          | 1.343                          | 1.348                          |
| (S)...H-N                         | 2.580                          | -                              | -                              |
| N-H...O(17)                       |                                | 2.120                          | 2.370                          |
| Angles/°                          |                                |                                |                                |
| N-C <sub>α</sub> -C <sub>β</sub>  | 109.0                          | 113.6                          | 112.1                          |
| N-C <sub>α</sub> -C(3)            | 114.2                          | 109.0                          | 109.8                          |
| C <sub>α</sub> -C <sub>β</sub> -S | 115.0                          | 116.9                          | 116.4                          |
| O(2)-C-O(3)                       | 126.7                          | 126.9                          | 127.9                          |
| C <sub>α</sub> -C(3)-O(3)         | 118.9                          | 117.4                          | 115.5                          |
| C(2)-N-C <sub>α</sub>             | 125.4                          | 125.5                          | 125.9                          |
| O(1)-C(2)-N                       | 123.4                          | 123.4                          | 123.9                          |

| Dihedralangles/°                       |       |       |       |
|----------------------------------------|-------|-------|-------|
| S-C <sub>β</sub> -C <sub>α</sub> -N    | 53.6  | 61.8  | -66.8 |
| C <sub>α</sub> -N-C(2)-C(1)            | 176.7 | 176.5 | 173.2 |
| C <sub>β</sub> -C <sub>α</sub> -N-C(2) | 150.0 | 79.4  | 120.3 |
| N-C <sub>α</sub> -C(3)-O(3)            | 173.1 | 171.6 | 153.9 |

<sup>a</sup> ref [5]; <sup>ba</sup>B3LYP/6-311++G(d,p), IEFPCM(water);

**Table S8-** Selected bands observed in the Raman spectra of N-acetyl-L cysteine in aqueous solution at 6.93-12 pH.

| <i>pH</i> | <i>Approximate description of modes</i> |
|-----------|-----------------------------------------|
|-----------|-----------------------------------------|

| 6.93      | 8.63         | 9.06       | 9.50        | 10.05               | 10.50               | 10.75     | 10.82                  | 11.04       | 11.30        | 12.00       |                                                    |
|-----------|--------------|------------|-------------|---------------------|---------------------|-----------|------------------------|-------------|--------------|-------------|----------------------------------------------------|
| 2582 (70) | 2580 (70)    | 2581 (66)  | 2581 (56)   | 2581(35)            | 2581(17)            | 2580(11)  | 2580 (10)              | 2580 (5)    | 2580 (4)     | -           | $\nu$ S-H                                          |
| 1637 (26) | 1631(29)     | 1628 (27)  | 1635 (30)   | 1645 sh<br>1632(35) | 1645 sh<br>1632(39) | 1633 (38) | 1633(41)               | 1630 (38)   | 1630 (39)    | 1630 (23)   | $\nu$ C=O(NH)                                      |
| 1556 sh   | 1554 sh      | 1554 sh    | 1556 sh     | 1558 sh             | 1558sh              | 1558(11)  | 1558 (15)              | 1558 (13)   | 1558 (13)    | 1553 (18)   | $\nu_a$ CO <sub>2</sub> <sup>-</sup>               |
| -         |              |            |             |                     |                     |           |                        |             |              |             | $\delta$ NH                                        |
| 1443 sh   | 1440 sh      | 1440 sh    | 1440 sh     | 1438 sh             | 1438 sh             | 1435 sh   | -                      | -           |              |             | $\delta_a$ CH <sub>3</sub>                         |
| 1429 (19) | 1428(20)     | 1428 (20)  | 1430 (19)   | 1433 (27)           | 1435(25)            | 1435(20)  | 1434 (28)              | 1436 (26)   | 1436 (28)    | 1435 (26)   | $\delta$ CH <sub>2</sub>                           |
|           | 1397 sh      |            |             |                     |                     |           |                        |             |              |             | $\delta_a$ CH <sub>3</sub>                         |
| 1394 (26) | 1393 (27)    | 1394 (26)  | 1394 (26)   | 1395 (27)           | 1395 (24)           | 1401(15)  | 1397 (21)              | 1397(21)    | 1396(21)     | 1398 (26)   | $\nu_s$ CO <sub>2</sub> <sup>-</sup>               |
| 1380 (21) | 1381 (23)    | 1381 (24)  | 1381(23)    | 1381 (27)           | 1380(24)            | 1380 (19) | 1379 (23)              | 1379(22)    | 1380(23)     | 1381 (26)   | $\delta_s$ CH <sub>3</sub>                         |
| 1329 (21) | 1331 (25)    | 1330 (26)  | 1329 (25)   | 1331(30)            | 1331 (30)           | 1332 (31) | 1331 (30)              | 1330(29)    | 1332 (30)    | 1332 ((30)  | $\delta$ C <sub><math>\alpha</math></sub> H        |
| 1296 (15) | 1296 (19) br | 1296(22)br | 1296 (21)br | 1292 (27)           | 1289 (29)br         | 1289 (31) | 1289 (30)br<br>1285 sh | 1289 (29)br | 1287 (30) br | 1288 (30)br | $\nu$ N-C(O)                                       |
| 1244 (3)  | 1244 (3)     | 1244 (3)   | 1244 (3)    | 1244 (3)            | 1244 (3)            | 1236 (8)  | 1244 (3)               | 1241 (3)    | 1244 (3)     | 1244 (3)    | tw CH <sub>2</sub>                                 |
|           |              |            |             |                     |                     |           |                        |             |              |             | wag CH <sub>2</sub>                                |
| 1203 (1)  | 1200 (2)     | 1200(2)    | 1200(2)     | 1190(8)             | 1189 (9)            | 1187 (11) | 1186 (12)              | 1188 (12)   | 1188 (12)    | 1188 (11)   | $\delta$ C <sub><math>\alpha</math></sub> H        |
| 1132 (1)  | 1125 (4)     | 1120(5)    | 1122 (4)    | 1116 (6)            | 1113 (8)            | 1112 (11) | 1113 (10)              | 1113(12)    | 1113 (10)    | 1113 (11)   | $\nu$ N-C $\alpha$                                 |
| 1062 (2)  | 1062 (2)     | 1062 (2)   | 1062 (2)    | 1062 (2)            | 1062 (2)            | 1062 (2)  | 1062 (2)               | 1062 (2)    | 1062 (2)     | 1062 (2)    | $\rho$ CH <sub>3</sub>                             |
| 1044 (2)  | 1040 (2)     | 1040(6)    | 1038 (6)    | 1036 (8)            | 1037 (10)           | 1040 (11) | 1039 ((9)              | 1038(7)     | 1039 (8)     | 1039 (10)   | $\nu$ □C <sub><math>\beta</math></sub> -C $\alpha$ |
| 983 (20)  | 982 (21)     | 982 (23)   | 983(19)     | 980 (15)            | 976sh               | 980 sh    | 976 sh                 | 977 sh      | 975 sh       | 976 sh      | $\nu$ C(O)-CH <sub>3</sub>                         |
| 966 (16)  | 966 (16)     | 970 (21)   | 968(16)     | 969 (18)            | 964 (23)            | 963 (20)  | 963 (24)               | 963(19)     | 963 (23)     | 963 (16)    | $\nu$ C $\alpha$ -CO <sub>2</sub> <sup>-</sup>     |
| 940 (5)   | 935 (6)      | 935 (8)    | 935 (10)    | 934 (18)            | 935 (21)            | 933 (23)  | 936 (32)               | 934 (30)    | 935 (32)     | 935 (26)    |                                                    |
| 897(6)    | 897(6)       | 897(6)     | 897(6)      | 897(6)              | 897(6)              | 897 (11)  | -                      |             |              | -           | $\nu$ C $\alpha$ -C(O)                             |
| 821       | 823 (9)      | 823 (9)    | 822 (9)     | 822 (9)             | 821 (12)            | 836 (5)   | 836 (10)               | 835 (10)    | 835 (32)     | 836         | $\delta$ CO <sub>2</sub> <sup>-</sup>              |



|          |          |          |          |          |          |          |          |          |          |          |                                          |
|----------|----------|----------|----------|----------|----------|----------|----------|----------|----------|----------|------------------------------------------|
| (9)      |          |          |          |          |          | 821(4)   |          |          |          | (7)      |                                          |
| 783 (2)  | 783 (2)  | 784 (4)  | □□□□□□   | 784 (9)  | 780 (7)  | 795 (1)  | 795 (1)  | 790 sh   | 790 sh   | -        | $\delta$ C-S-H                           |
| 686 (32) | 686 (36) | 684 (35) | □□□□□□□  | 686 (47) | 686 (47) | 686 (50) | 686(51)  | 686 (52) | 686 (50) | 685 (51) | $\nu$ C-S                                |
| 653 (11) | 651 (13) | 651 (13) | □□□□□□□  | 653 (18) | 652(14)  | 655 (14) | 650 (18) | 650(19)  | 651 (15) | 652 (18) | $\pi$ CH <sub>3</sub> -C=O out-of- plane |
|          |          |          |          |          |          |          |          |          |          |          | $\pi$ C=O <sub>acid</sub> in-of- plane   |
| 544 (2)  | 541 (1)  | 542 (6)  | 543 (7)  | 542 (8)  | 544 (10) | 545 (8)  | 542 (11) | 545 (11) | 544 (10) | 545 (11) | $\pi$ C=O <sub>acid</sub> of- plane      |
| 389 (2)  | 387(2)   | 385 (8)  | □□□□□□□□ | 386 (8)  | 386 (10) | 390 (10) | 389 (9)  | 389 (9)  | 389 (9)  | 389 (9)  | $\Pi$ N-H out-of- plane                  |

**Table S9-** pK' values of the -SH group in NAC

| pH    | pK'  |
|-------|------|
| 6.94  | 8.90 |
| 8.63  | 9.15 |
| 9.06  | 9.32 |
| 9.50  | 9,56 |
| 10.05 | 9,73 |
| 10.50 | 9,72 |
| 10.75 | 9,77 |
| 10.82 | 9,77 |
| 11.04 | 9,77 |
| 11.30 | 9,78 |

**Table S10-** C=O<sub>amide</sub>, C(O)-N, C <sub>$\alpha$</sub> -N, C-S and N-H electron occupancy of the Natural Bond Orbitals and NPA charges at the B3LYP / 6-311++G(d,p) level of theory.

| C=O <sub>amide</sub> | $\sigma$ | $\pi$ | $\sigma^*$ | $\pi^*$ | q(O)   | q(C)  |
|----------------------|----------|-------|------------|---------|--------|-------|
| <i>l</i> -NAC        | 1.993    | 1.992 | 0.043      | 0.247   | -0.637 | 0.687 |

|                               |       |       |       |       |        |       |
|-------------------------------|-------|-------|-------|-------|--------|-------|
| <i>I-NACdep<sup>-</sup></i>   | 1.992 | 1.991 | 0.059 | 0.287 | -0.674 | 0.665 |
| <i>I-NACdepp<sup>-2</sup></i> | 1.993 | 1.993 | 0.023 | 0.377 | -0.719 | 0.657 |

| <b>C(O)-N</b>                 | $\sigma$ | $\sigma^*$ | q(C)  | q(N)   |
|-------------------------------|----------|------------|-------|--------|
| <i>I-NAC</i>                  | 1.991    | 0.075      | 0.687 | -0.638 |
| <i>I-NACdep<sup>-</sup></i>   | 1.990    | 0.070      | 0.665 | -0.641 |
| <i>I-NACdepp<sup>-2</sup></i> | 1.990    | 0.064      | 0.657 | -0.612 |

| <b>C<sub>α</sub>-N</b>        | $\sigma$ | $\sigma^*$ | q(C)   | q(N)   |
|-------------------------------|----------|------------|--------|--------|
| <i>I-NAC</i>                  | 1.986    | 0.029      | -0.135 | -0.638 |
| <i>I-NACdep<sup>-</sup></i>   | 1.985    | 0.035      | -0.138 | -0.641 |
| <i>I-NACdepp<sup>-2</sup></i> | 1.985    | 0.037      | -0.143 | -0.612 |

| <b>N-H</b>                    | $\sigma$ | $\sigma^*$ | q(N)   | q(N)  |
|-------------------------------|----------|------------|--------|-------|
| <i>I-NAC</i>                  | 1.985    | 0.018      | -0.638 | 0.200 |
| <i>I-NACdep<sup>-</sup></i>   | 1.979    | 0.028      | -0.641 | 0.408 |
| <i>I-NACdepp<sup>-2</sup></i> | 1.982    | 0.043      | -0.612 | 0.410 |

| <b>C-S</b>                    | $\sigma$ | $\sigma^*$ | q(C)   | q(S)   |
|-------------------------------|----------|------------|--------|--------|
| <i>I-NAC</i>                  | 1.985    | 0.015      | -0.484 | -0.028 |
| <i>I-NACdep<sup>-</sup></i>   | 1.988    | 0.027      | -0.473 | -0.084 |
| <i>I-NACdepp<sup>-2</sup></i> | 1.984    | 0.016      | -0.492 | -0.750 |

**Figure S1.** The pH metric titration curve of NAC

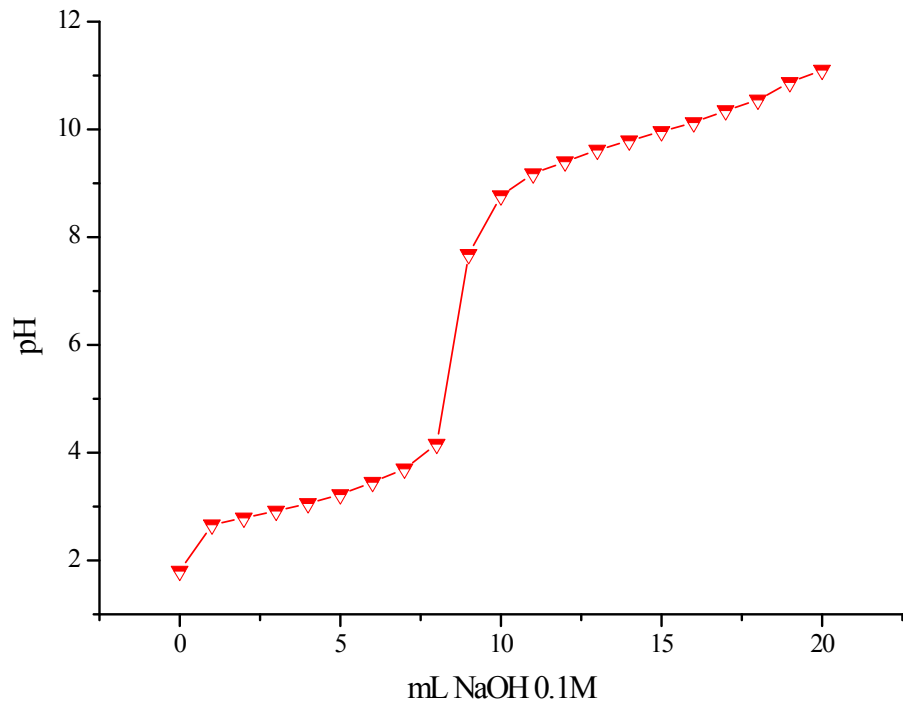

**Figure S2.** Raman spectra of *NAC* in the solid state and in water solution at different concentrations.

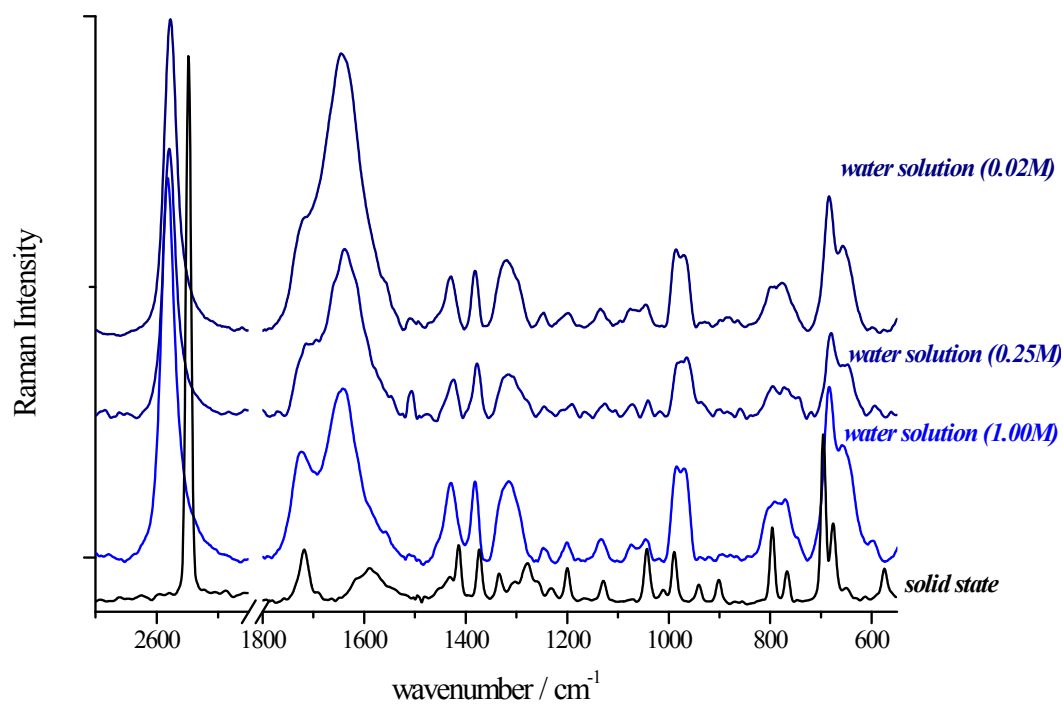

**Figure S3.** Fractional ionization  $\alpha_{SH}$  vs concentration

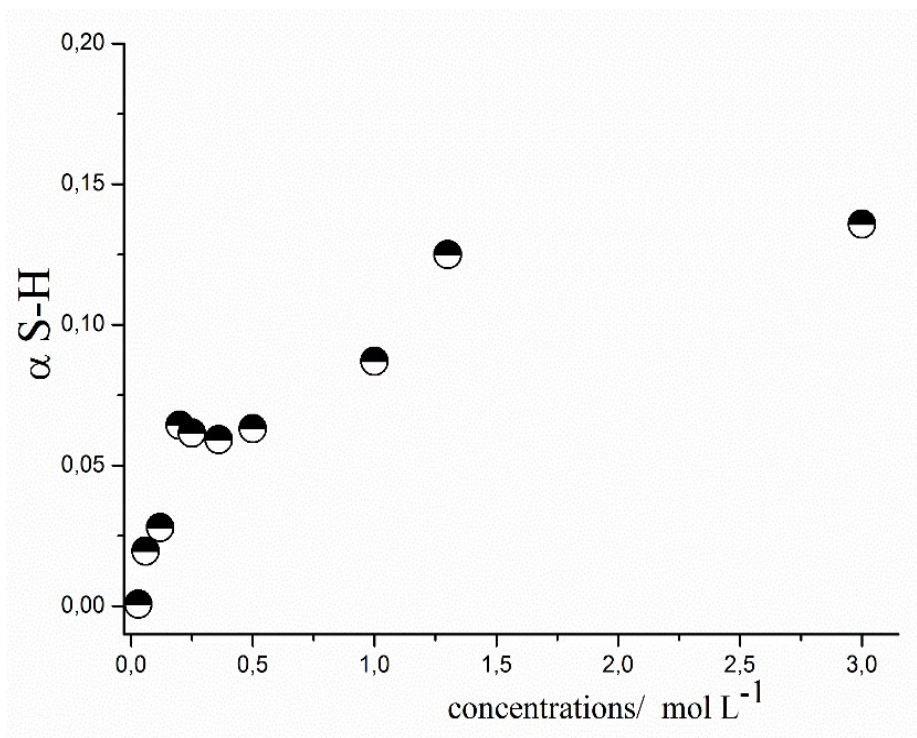

**Figure S4-** Calculated potential curves about the Ag–S bond (up) and Ag–O(down) in 1-NACdep<sup>-</sup> using semiempirical (PM6) levels of theory

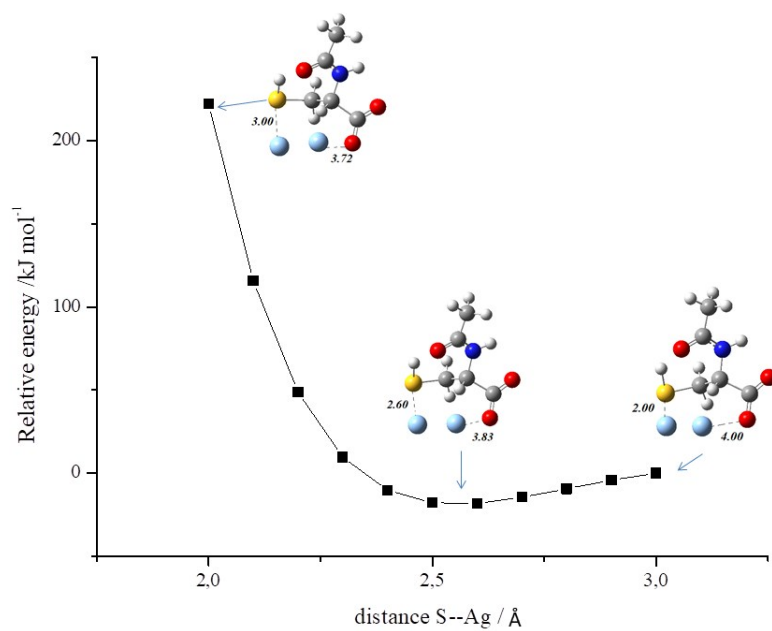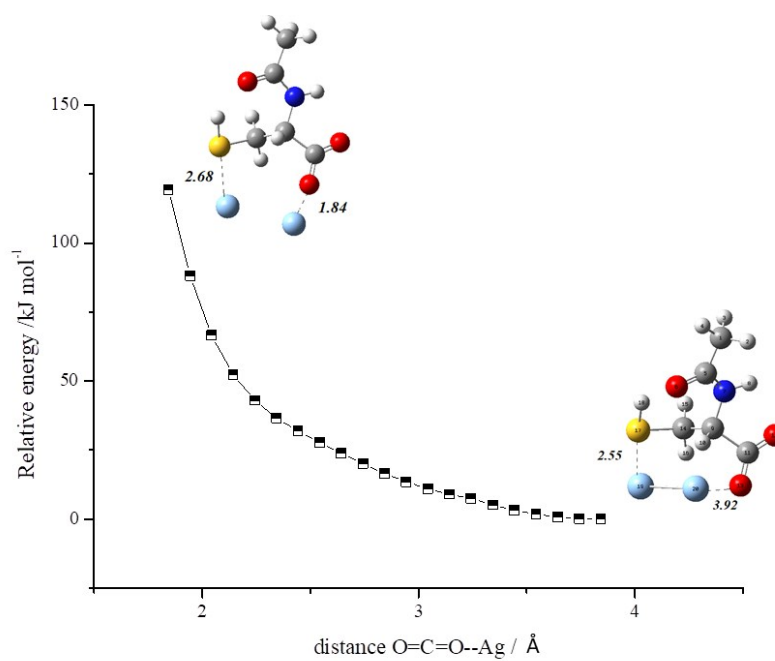

**Figure S5-** Calculated potential curves about the Ag–S bond (up) and Ag–O(down) in 3-NACdep<sup>-</sup> using semiempirical (PM6) levels of theory

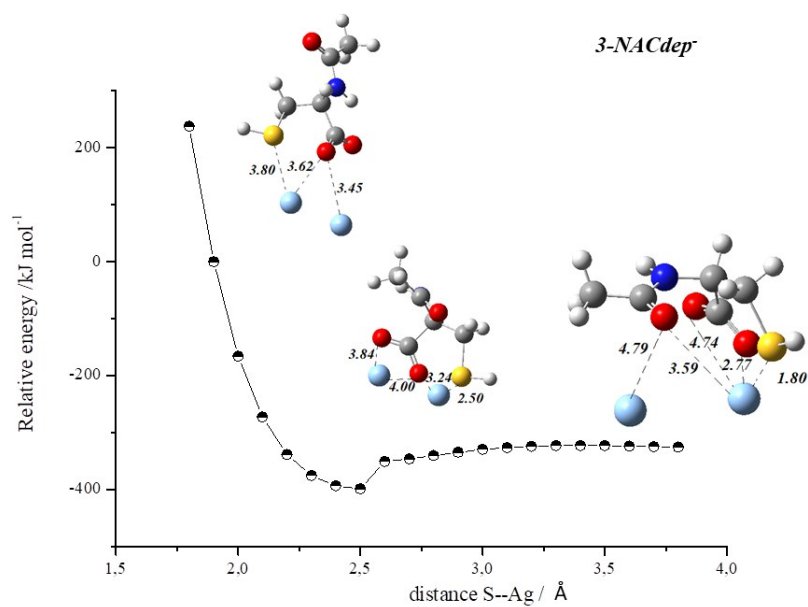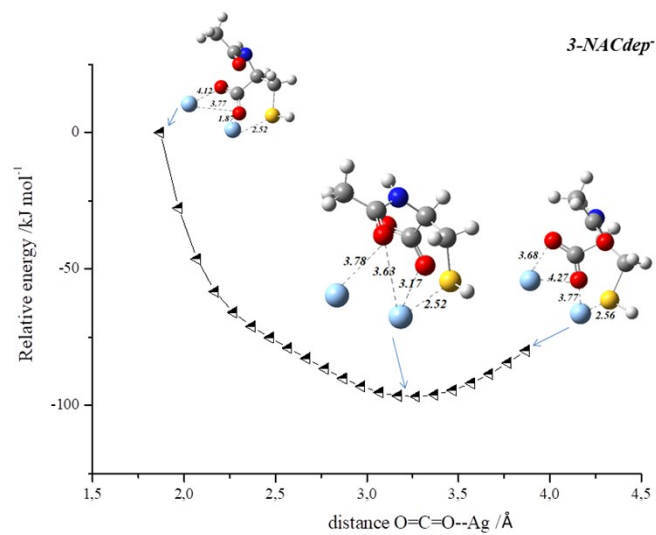

Figure S6

*Theoretical UV spectra of NACdepp<sup>2-</sup> form in water solution*

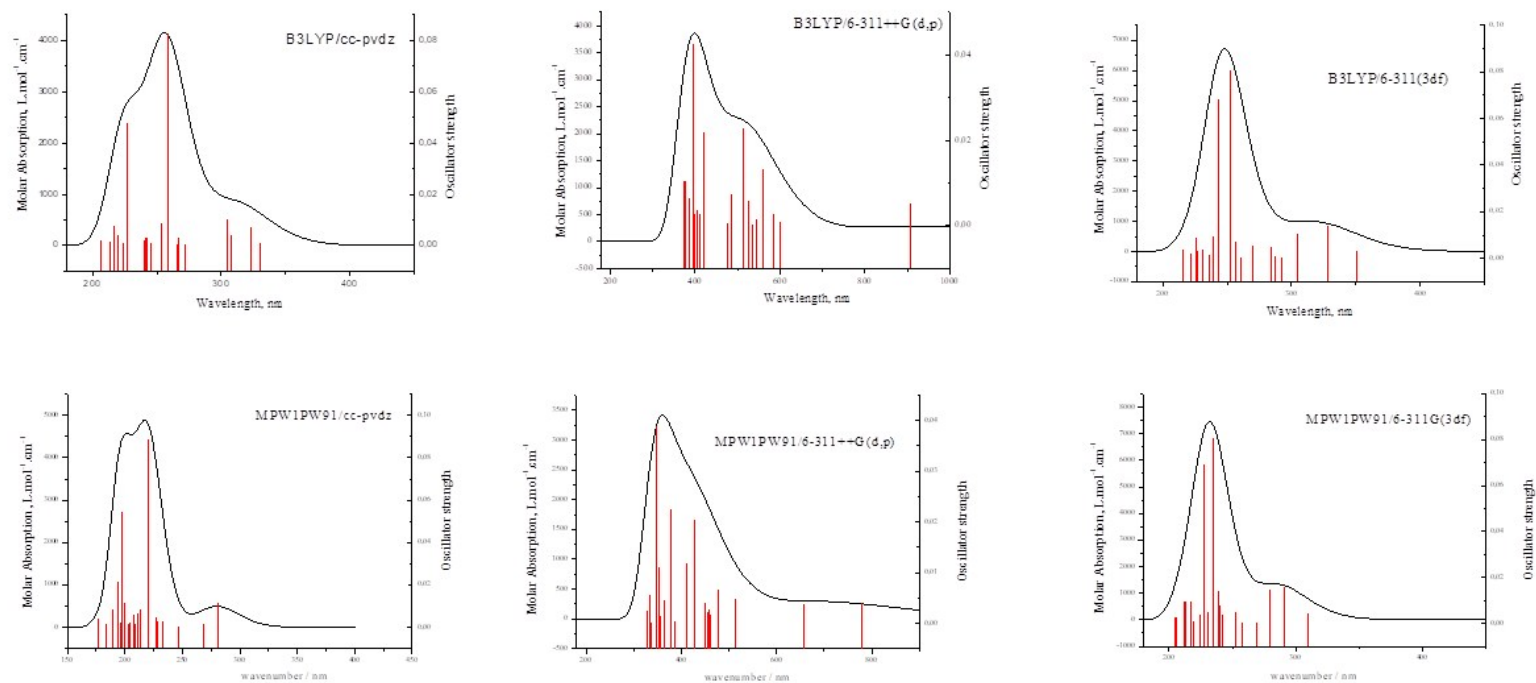



**Figure S7-** Raman spectra of the *NAC* at different pH value in the 1500-1200 region.

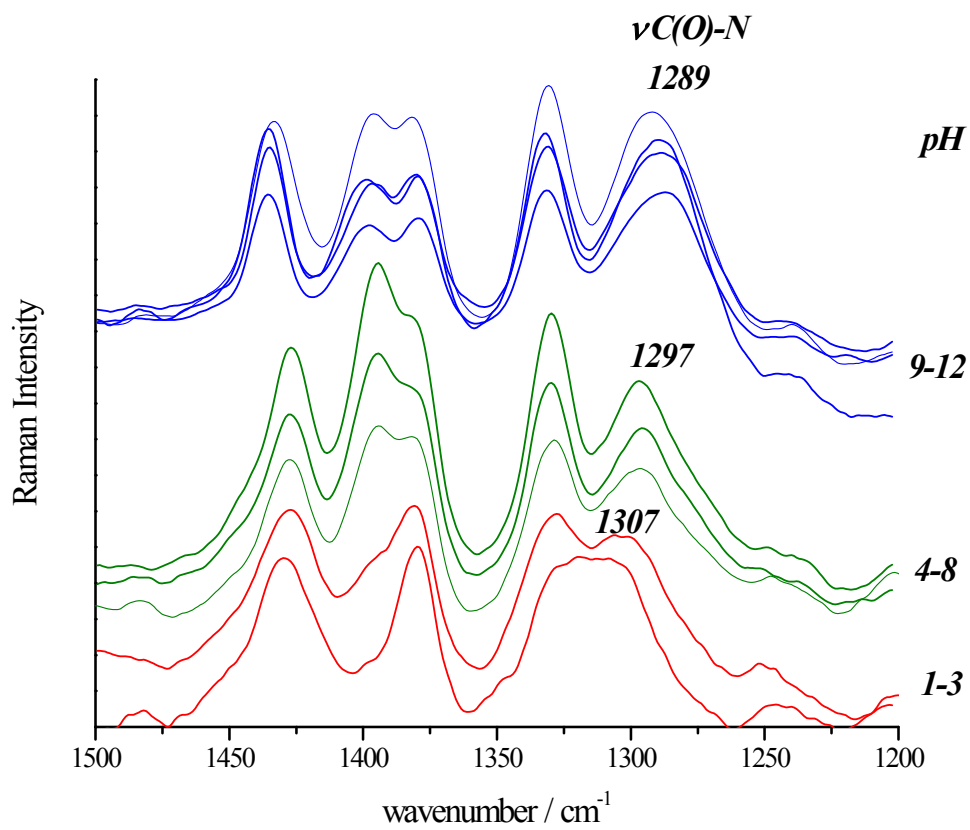

Supplement: c9nj02427a1.pdf [file c9nj02427a1.pdf]
